# Supplementary material for: Single cell profiling of γδ hepatosplenic T-cell lymphoma unravels tumor cell heterogeneity associated with disease progression
Source: PubMed Central journal article supplement (PMC9947078; doi:10.1007/s13402-022-00745-x), 2022-11-22

**Figure S1. CT scans of lymph node indicate lymphadenopathy is absent. (A) Red marks left inguinal lymph node (B) Red marks left upper cervical lymph node**

**A**

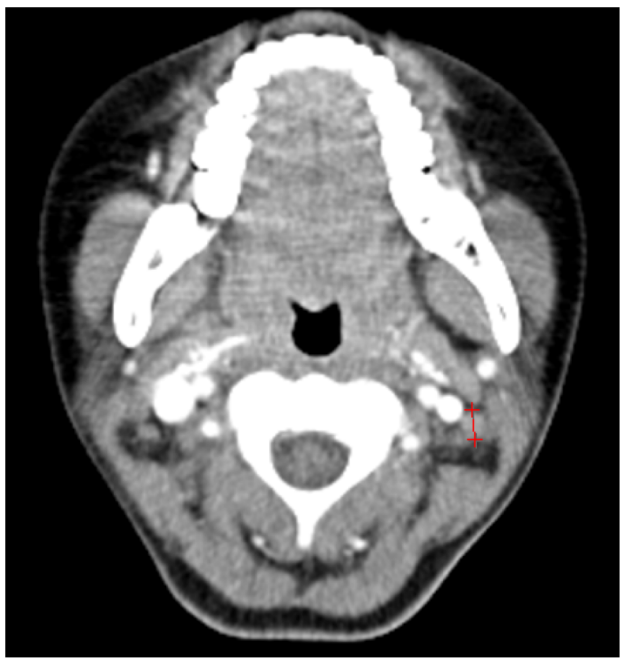

**B**

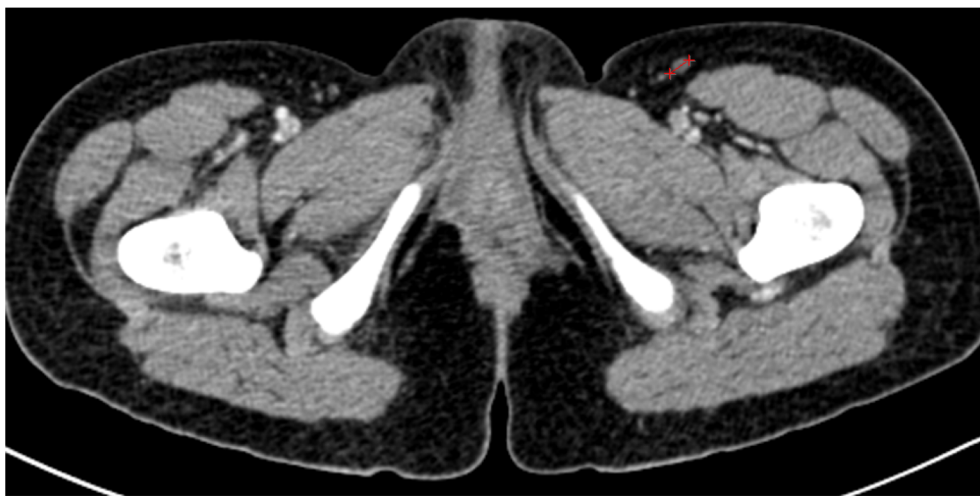

Figure S2. UMAP projections of each sequenced sample.

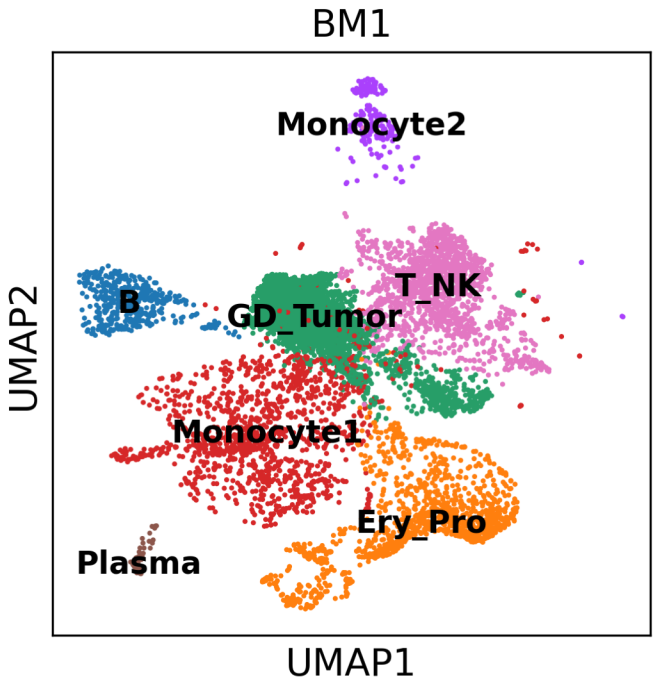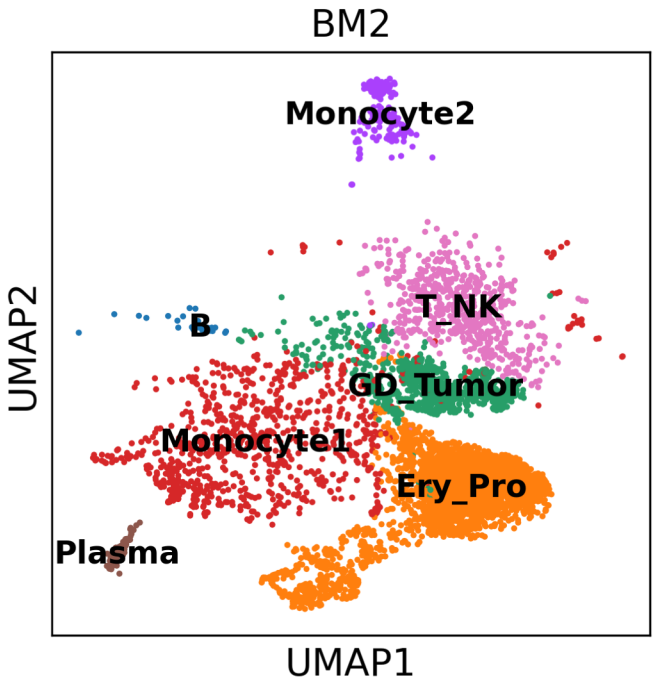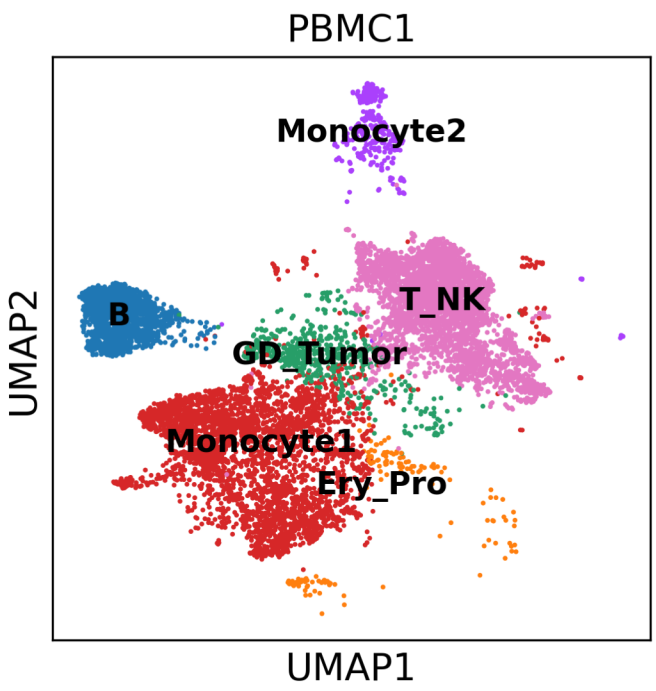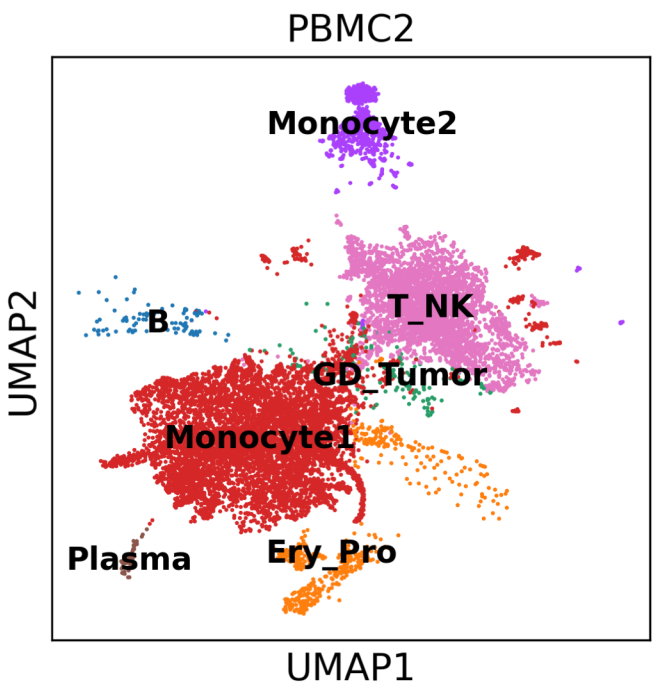

**Figure S3. Expression of common markers used for HSTCL diagnosis**

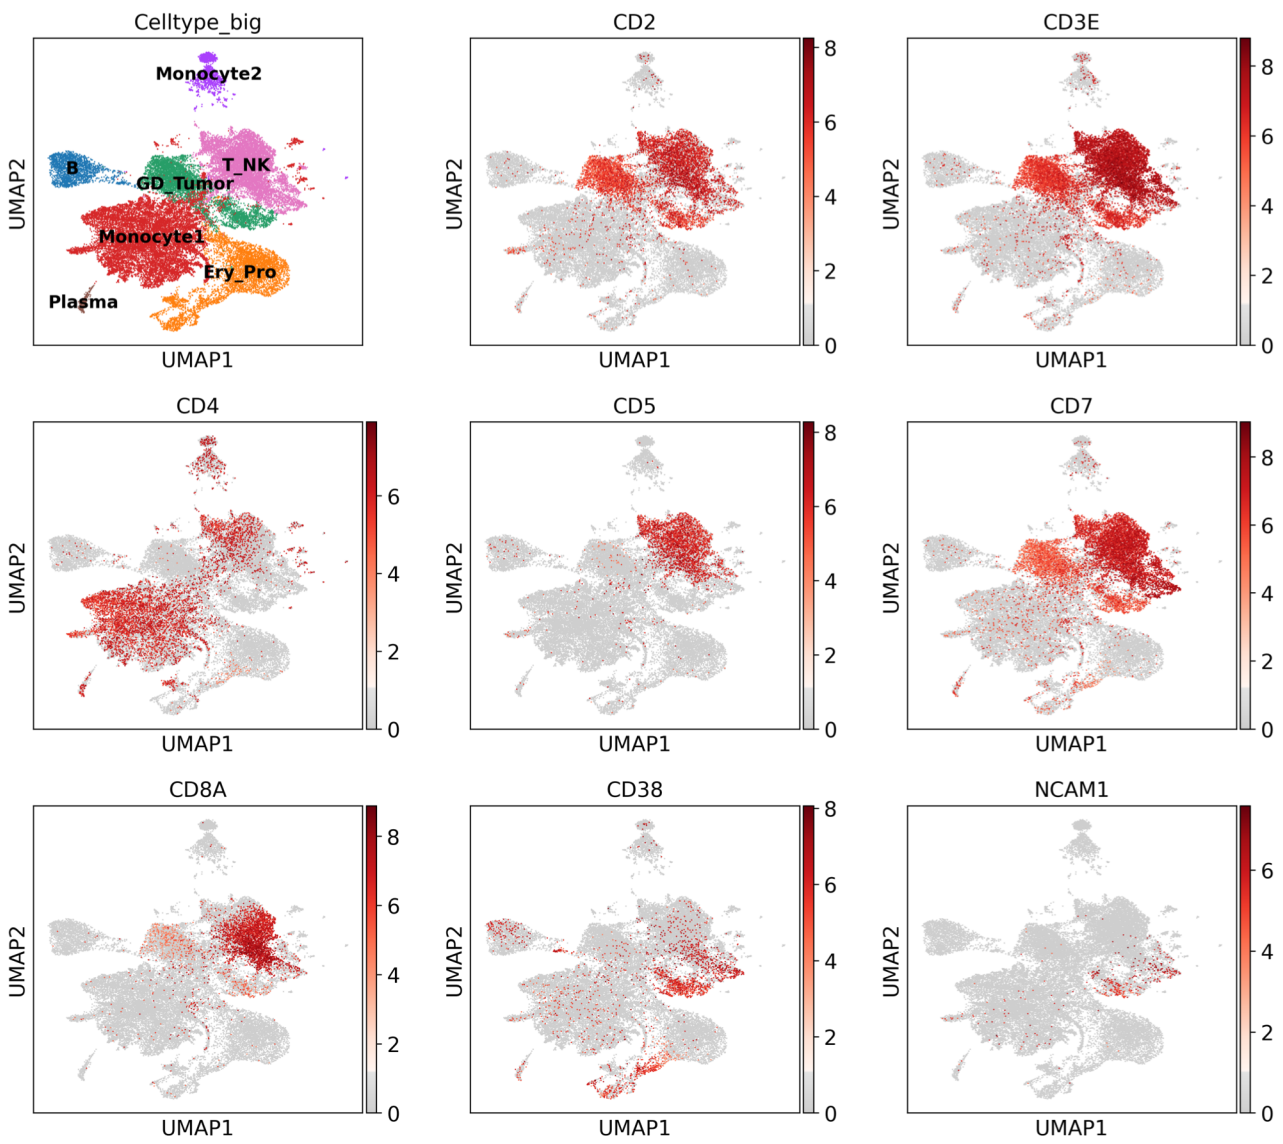

**Figure S4. Sub-clusters identified in Ery\_Pro.** (A) UMAP of sub-clusters in Ery\_Pro. Gran: Granulocyte progenitors, Multi\_Pro: multipotent progenitors (B) The expression of marker genes for to the sub-clusters annotation

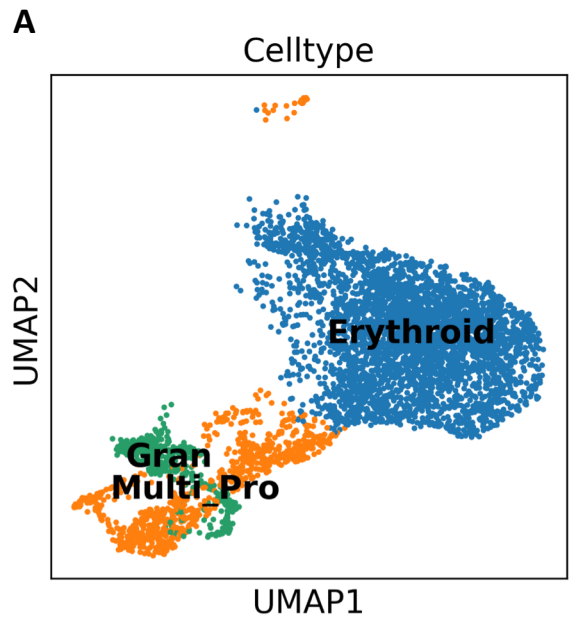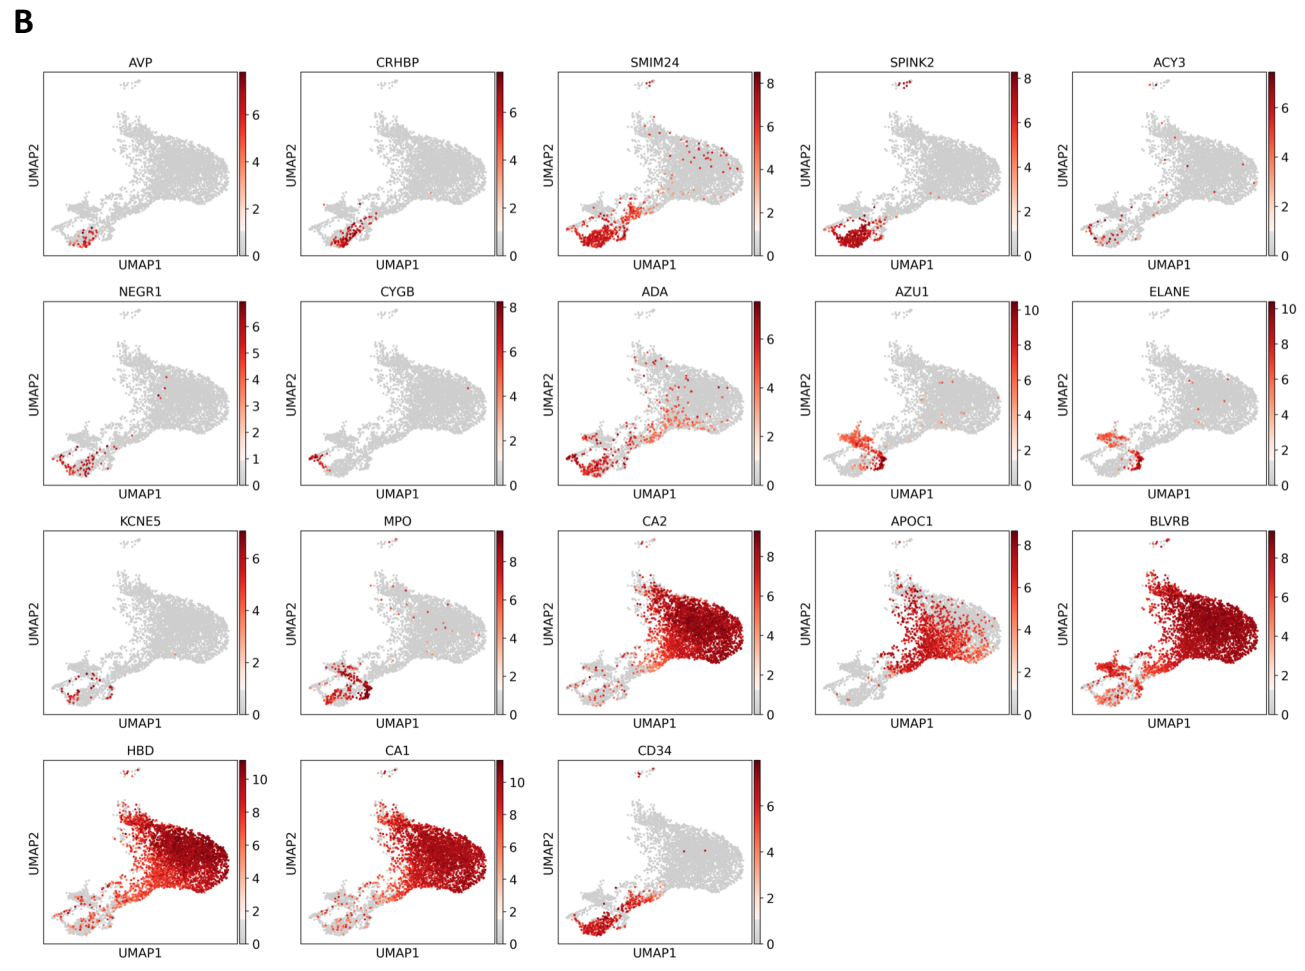

**Figure S5. Cytotoxic genes reported to be expressed in normal  $\gamma\delta$  T cells had no or low expression in malignant  $\gamma\delta$  T cells**

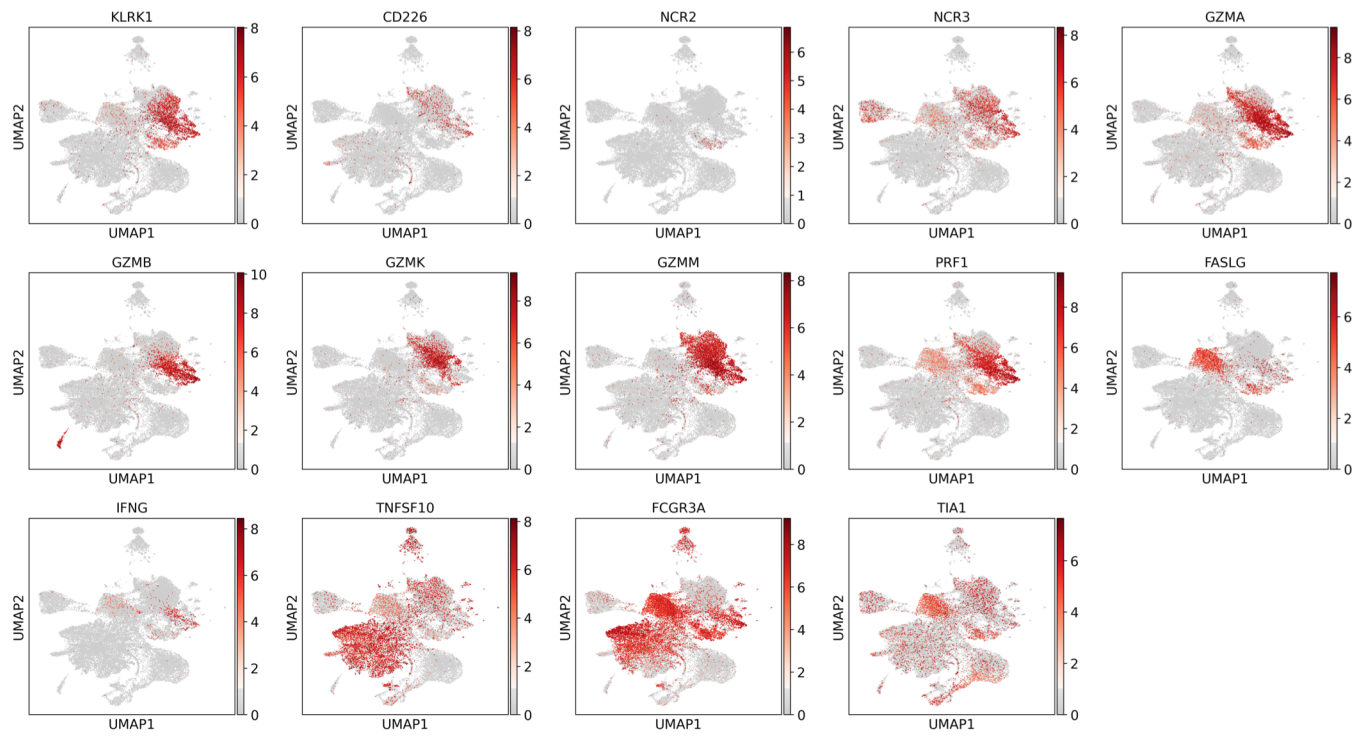

Figure S6. Cell Cycle phase distribution in Tumor sub-clusters

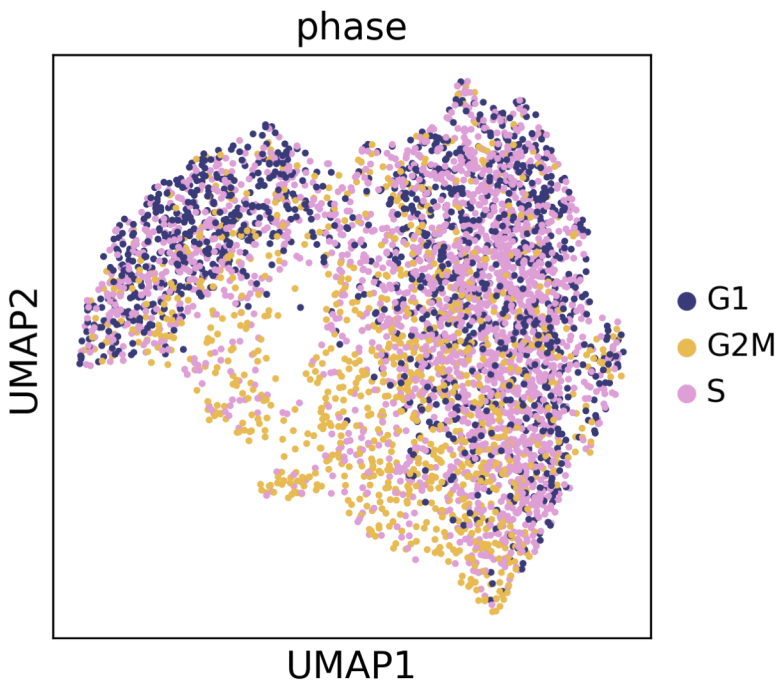

**Figure S7. CD19 was highly expressed in Tumor\_1 but not Tumor\_2. Other B cell marker were not expressed in both Tumor sub-clusters**

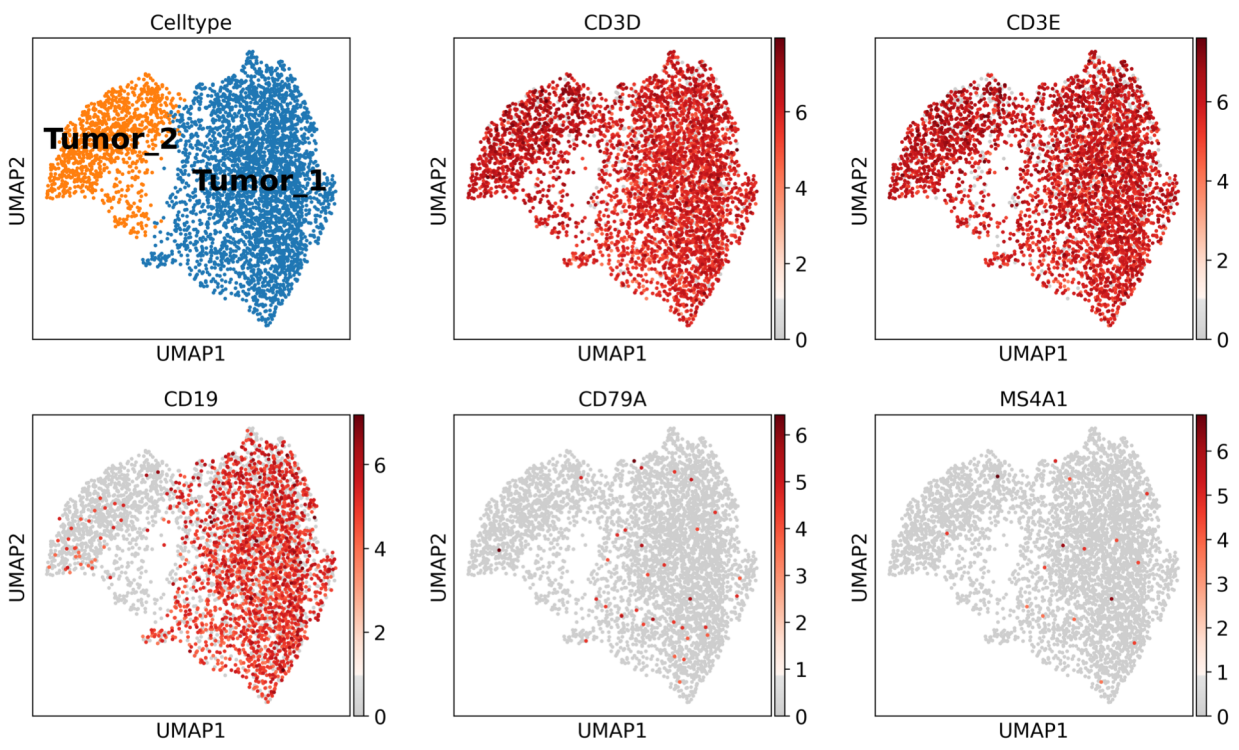

**Figure S8. T cell sub-clusters identified from the tumor microenvironment. (A and B) The expression of marker genes for the T cell sub-clusters annotation**

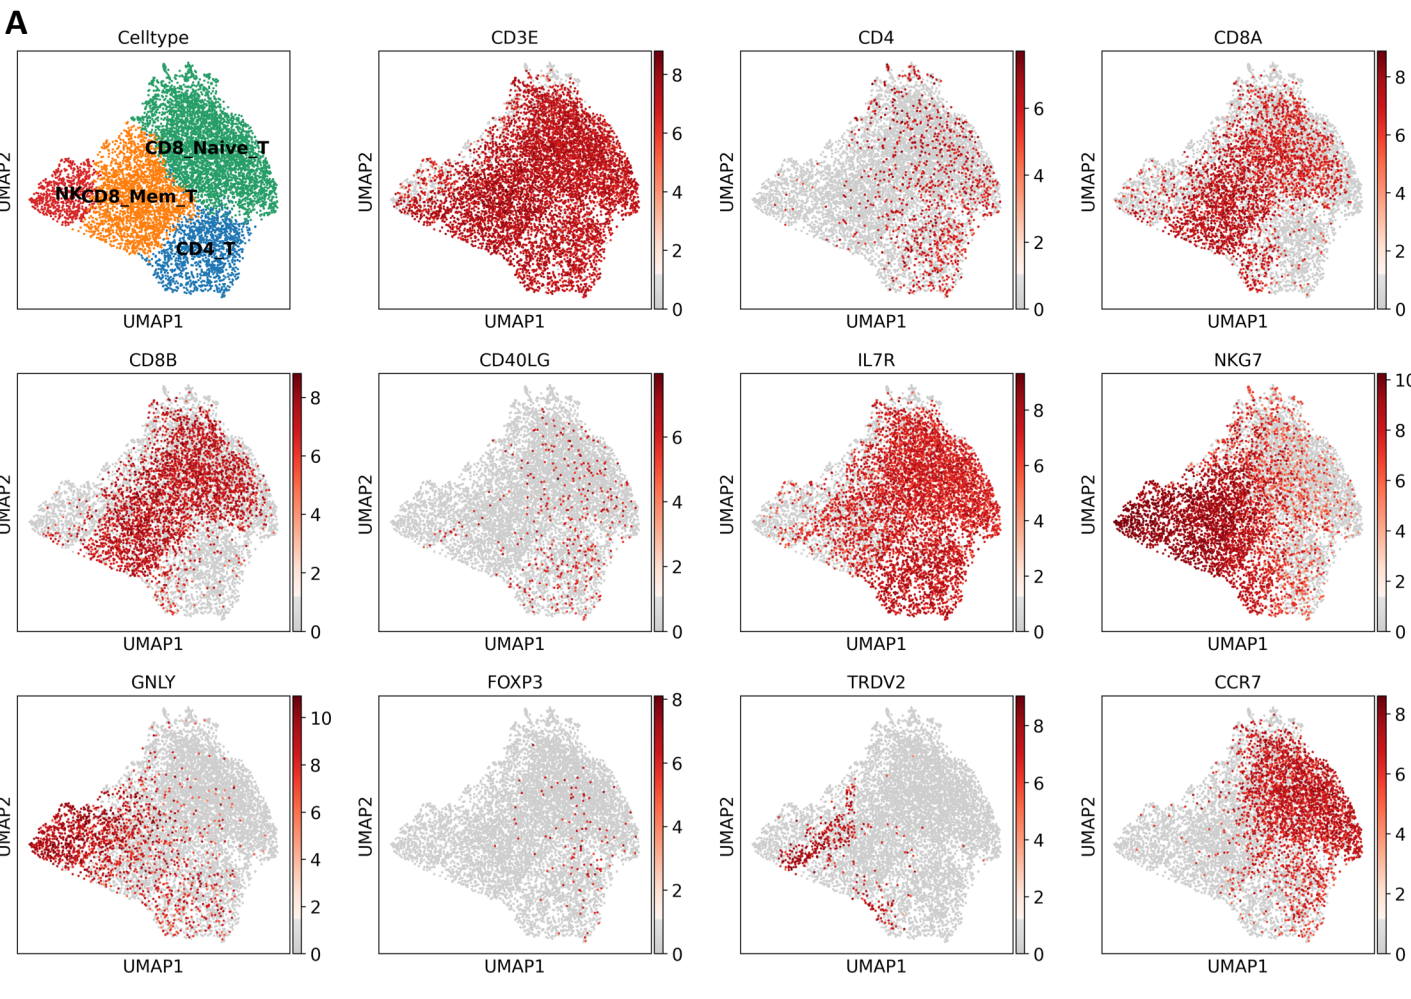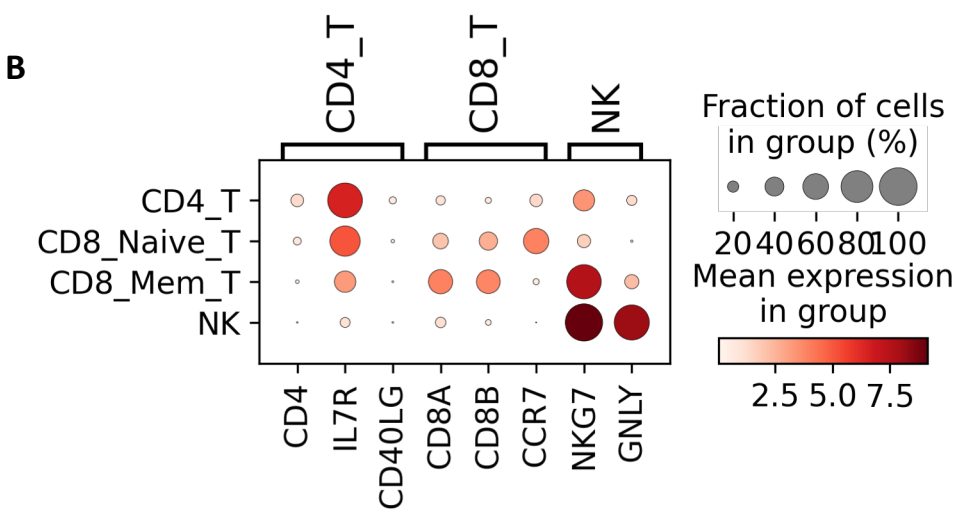



**Figure S9. Total interaction counts and interaction strength inferred from each sample**

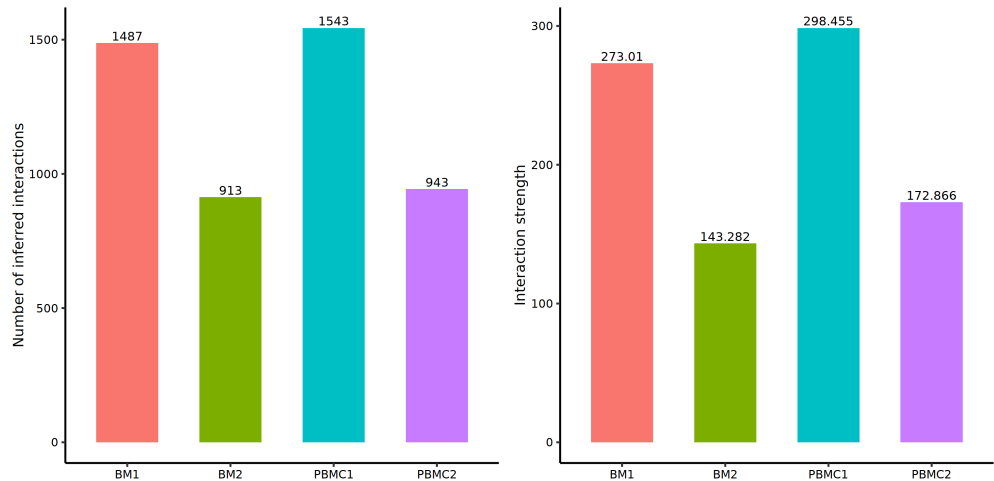

Supplement: 13402_2022_745_MOESM2_ESM.pdf [file 13402_2022_745_MOESM2_ESM.pdf]
